# Supplementary material for: Alterations in the Gut Microbiome and Metabolisms in Pregnancies with Fetal Growth Restriction
Source: PubMed Central journal article supplement (PMC10269609; doi:10.1128/spectrum.00076-23), 2023-05-18
Supplement: spectrum.00076-23-s0001.pdf [file spectrum.00076-23-s0001.pdf]

1 **Alterations in the gut microbiome and metabolisms in pregnancies with**  
2 **fetal growth restriction**

3 **Running title: Gut dysbiosis and metabolic disorders in FGR**

4  
5 Zixin Tao<sup>1#</sup>, Yun Chen<sup>1#</sup>, Fang He<sup>2</sup>, Jiawei Tang<sup>3</sup>, Limei Zhan<sup>4</sup>, Haoyue Hu<sup>1</sup>, Ziling Ding<sup>1</sup>, Shenghang  
6 Ruan<sup>5</sup>, Yutao Chen<sup>3</sup>, Beier Chen<sup>3</sup>, Yan Wang<sup>1</sup>, Xiaoling Guo<sup>4</sup>, Liwei Xie<sup>6\*</sup>, Mei Zhong<sup>1\*</sup>, Qitao Huang<sup>7\*</sup>

7  
8 <sup>1</sup>Department of Obstetrics and Gynecology, Nanfang Hospital, Southern Medical University, Guangzhou,  
9 Guangdong, China

10 <sup>2</sup>Department of Obstetrics and Gynecology, The Third Affiliated Hospital of Guangzhou Medical  
11 University, Guangzhou, Guangdong, China

12 <sup>3</sup>The Second School of Clinical Medicine, Southern Medical University, Guangzhou, Guangdong, China

13 <sup>4</sup>Foshan Women and Children Hospital Affiliated to Southern Medical University, Foshan, Guangdong,  
14 China

15 <sup>5</sup>The First School of Clinical Medicine, Southern Medical University, Guangzhou, Guangdong, China

16 <sup>6</sup>State Key Laboratory of Applied Microbiology Southern China, Guangdong Provincial Key  
17 Laboratory of Microbial Culture Collection and Application, Guangdong Open Laboratory of Applied  
18 Microbiology, Institute of Microbiology, Guangdong Academy of Sciences, Guangzhou, Guangdong,  
19 China

20 <sup>7</sup>Department of Obstetrics and Gynecology, The First People's Hospital of Foshan, Foshan, Guangdong,  
21 China

22  
23 **\*Correspondence:**

24 Professor Qitao Huang, Department of Obstetrics and Gynecology, The First People's Hospital of Foshan,  
25 Foshan, Guangdong, China, 528000; 15920454515@163.com

26 Professor Mei Zhong, Department of Obstetrics and Gynecology, Nanfang Hospital, Southern Medical  
27 University, Guangzhou, Guangdong, China, 510515; zhongmei@smu.edu.cn

28 Professor Liwei Xie, State Key Laboratory of Applied Microbiology Southern China, Guangdong  
29 Provincial Key Laboratory of Microbial Culture Collection and Application, Guangdong Open  
30 Laboratory of Applied Microbiology, Institute of Microbiology, Guangdong Academy of Sciences,  
31 Guangzhou, Guangdong, China, 510070; xielw@gdim.cn

32 <sup>#</sup> These authors contributed equally to this work.

33 **Supplementary materials**34 **Supplementary Table 1**

|                           | NP Group<br>(n=31) | FGR Group<br>(n=19) | <i>P</i> |
|---------------------------|--------------------|---------------------|----------|
| <b>Maternal features</b>  |                    |                     |          |
| Age (y)                   | 30.10±4.99         | 28.60±3.53          | 0.3322   |
| Gestational Age (w)       | 39.80±1.18         | 37.20±1.77          | <0.001   |
| BMI (kg/m <sup>2</sup> )  | 26.80±3.00         | 26.30±3.97          | 0.6154   |
| SBP (mmHg)                | 117 (112-124)      | 124 (120-138)       | 0.0024   |
| DBP (mmHg)                | 68.90±7.97         | 77.42±8.25          | 0.0009   |
| PLT (×10 <sup>9</sup> /L) | 229.6±59.76        | 250.8±54.14         | 0.2025   |
| ALT (U/L)                 | 10.27±2.97         | 11.87±4.98          | 0.2157   |
| AST (U/L)                 | 14.9 (12.8-17.8)   | 17.5 (13.2-21.8)    | 0.1647   |
| ALP (U/L)                 | 158 (131-181)      | 139 (117-179)       | 0.4662   |
| ALB (g/L)                 | 36.36±2.02         | 35.23±3.83          | 0.2462   |
| TBA (μmol/L)              | 3.3 (2.4-5.8)      | 3.1 (2.6-4.6)       | 0.6807   |
| TBil (μmol/L)             | 8.0 (7.0-9.7)      | 6.6 (5.5-8.2)       | 0.0031   |
| DBil (μmol/L)             | 1.4 (1.1-1.9)      | 1.1 (0.8-1.5)       | 0.0227   |
| Cr (μmol/L)               | 45.0 (42.0-49.0)   | 51.0 (40.0-56.0)    | 0.3182   |
| <b>Fetal features</b>     |                    |                     |          |
| NW (g)                    | 3310±301.6         | 2151±239.2          | <0.0001  |
| BPD (mm)                  | 92.0 (86.0-95.0)   | 83.0 (75.0-87.0)    | <0.0001  |
| HC (mm)                   | 328 (317-334)      | 296 (274-311)       | <0.0001  |
| AC (mm)                   | 334 (325-345)      | 286 (269-303)       | <0.0001  |
| FL (mm)                   | 72 (69-73)         | 63 (58-67)          | <0.0001  |
| AFV (mm)                  | 48.8±11.6          | 36.7±9.0            | 0.0001   |

35 Data was assessed for normality using the Shapiro-Wilk normality test, and was presented as mean ± SD  
36 or median (interquartile range). For normally distributed data, Student's *t*-test with Welch's correction  
37 was performed between two groups. For non-normal distributed data, Mann-Whitney U test was  
38 performed between two groups. BMI, body mass index; G, gravidity; P, parity; SBP, systolic blood  
39 pressure; DBP, diastolic blood pressure; PLT, platelet; ALT, alanine aminotransferase; AST, aspartate  
40 aminotransferase; ALP, alkaline phosphatase; ALB, albumin; TBil, total bilirubin; DBil, direct bilirubin;  
41 Cr, creatinine; NW, neonatal weight; BPD, biparietal diameter; HC, head circumference; AC, abdominal  
42 circumference; FL, femur length; AFV, amniotic fluid volume.

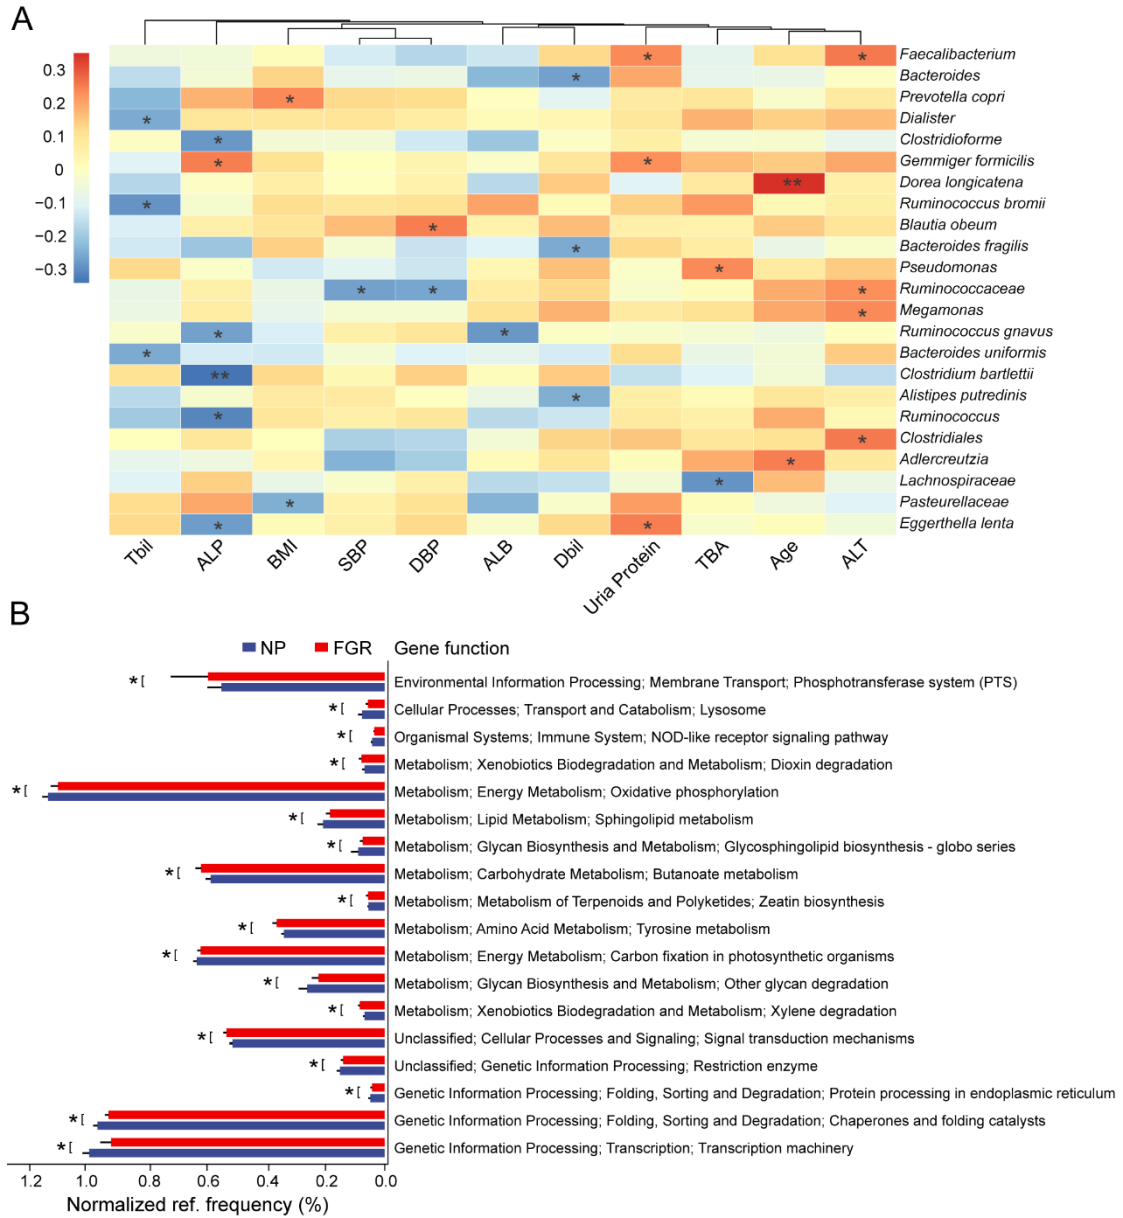

43

44 **Supplementary Figure 1 (A)** Correlation heatmap of maternal gut microbiota and maternal  
 45 clinical manifestations. Data was processed by Spearman's correlation test. **(B)** KEGG  
 46 pathways predicted by PICRUSt analysis. (\*  $P < 0.05$ , \*\*  $P < 0.01$ , \*\*\*  $P < 0.001$ . NP,  $n = 35$ ;  
 47 FGR,  $n = 35$ )

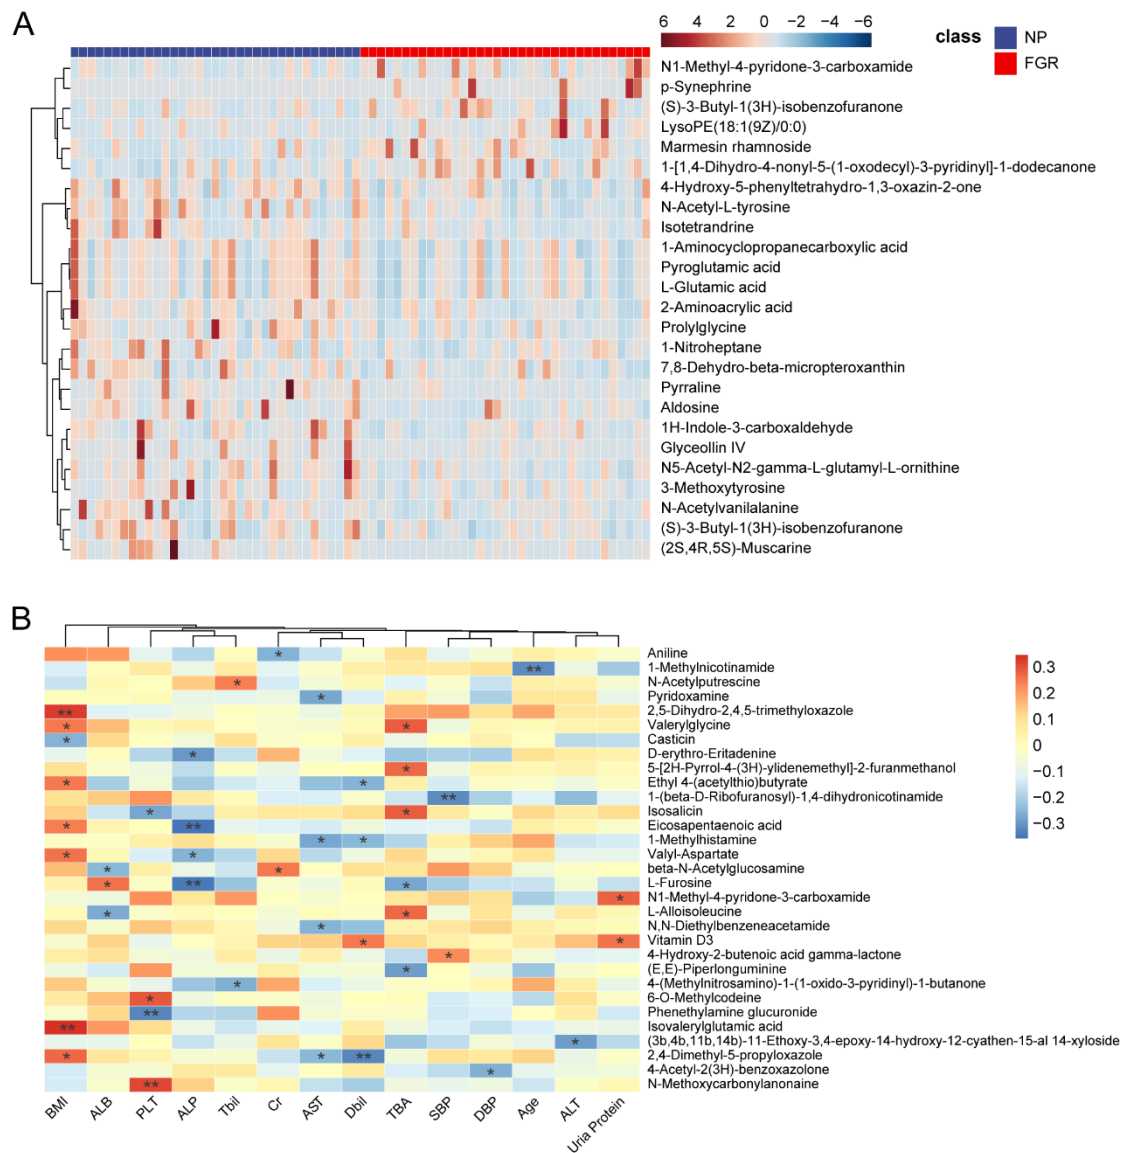

48

49 **Supplementary Figure 2 (A)** The top 25 abundant metabolites. **(B)** Correlation heatmap of  
 50 maternal gut metabolites and maternal clinical manifestations. Data was processed by  
 51 Spearman's correlation test. \*  $P < 0.05$ , \*\*  $P < 0.01$ , \*\*\*  $P < 0.001$ . NP,  $n = 35$ ; FGR,  $n = 35$ .

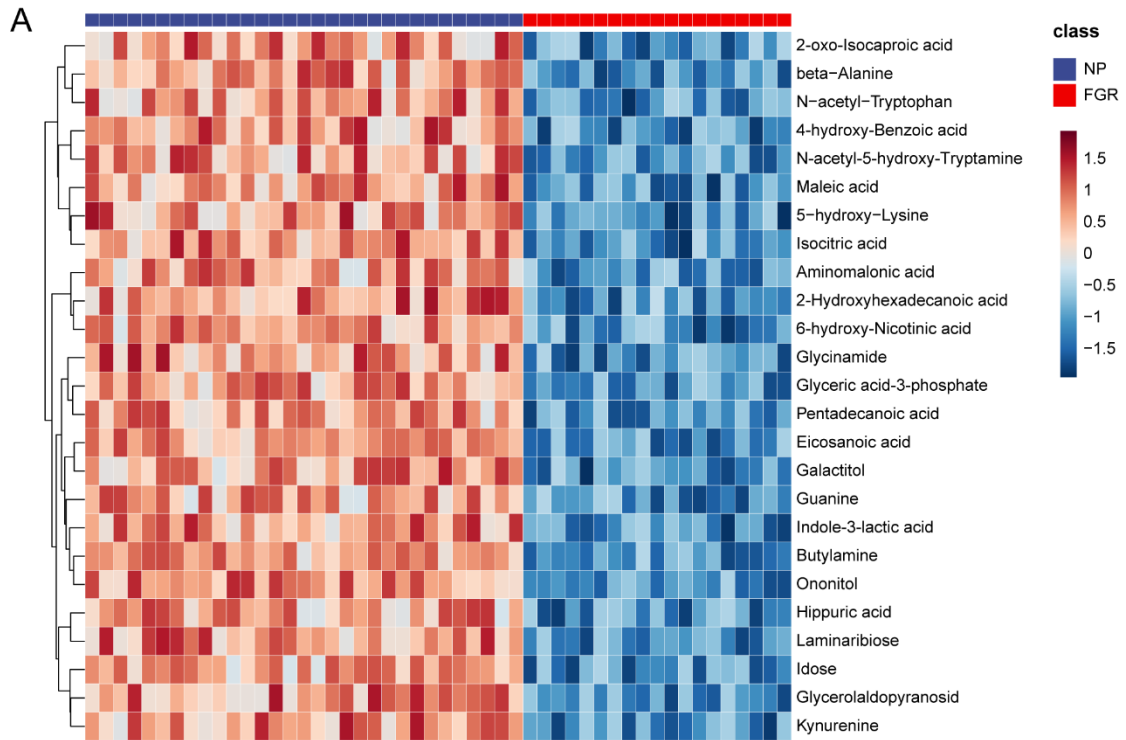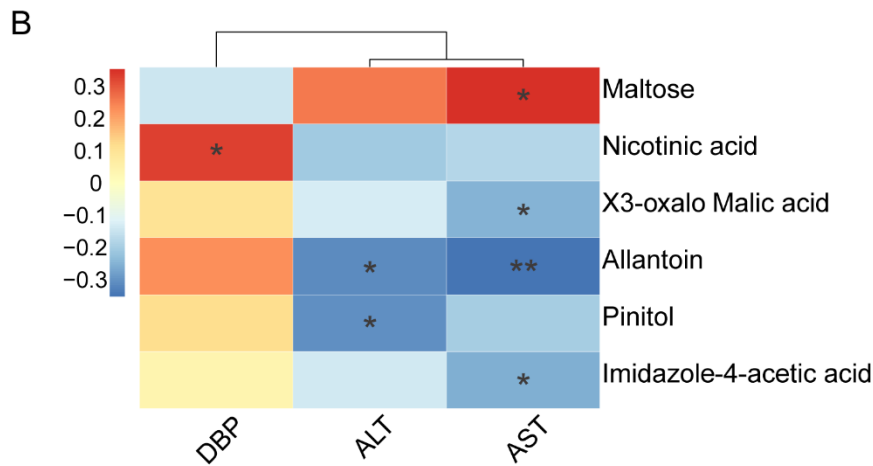

52

53 **Supplementary Figure 3 (A)** The top 25 abundant metabolites. **(B)** Correlation heatmap of

54 maternal serum metabolites and maternal clinical manifestations. Data was processed by

55 Spearman's correlation test. \* $P < 0.05$ , \*\* $P < 0.01$ . NP,  $n = 31$ ; FGR,  $n = 19$ .

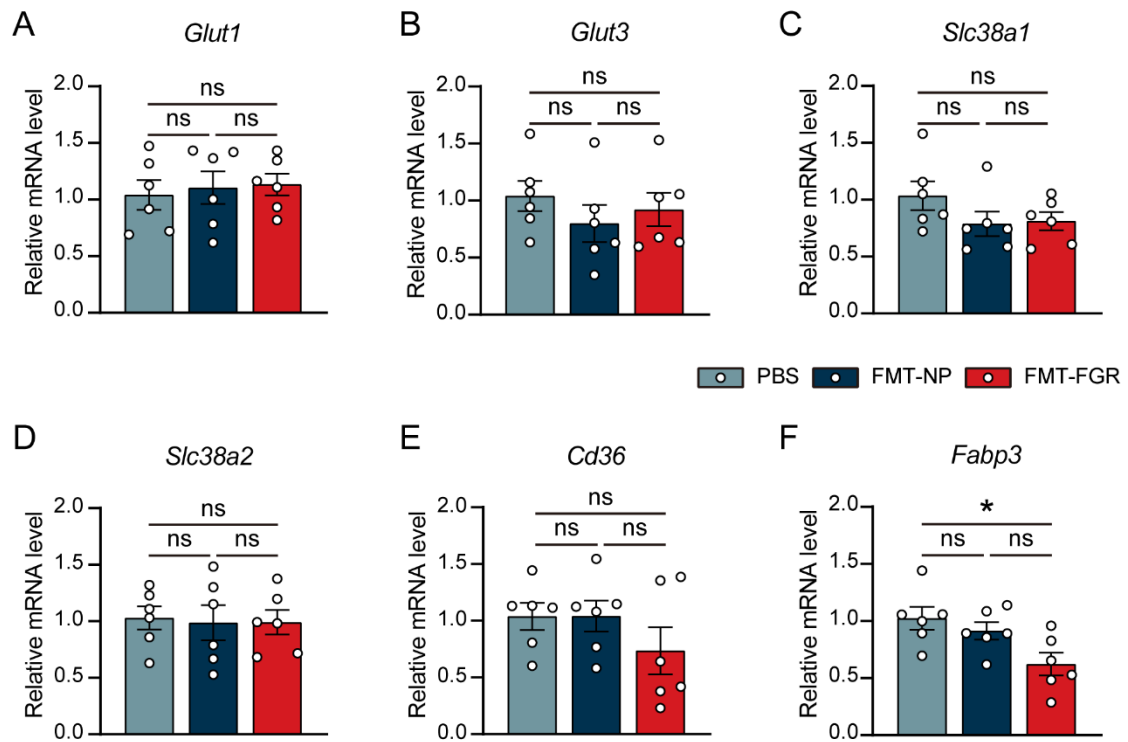

56

57 **Supplementary Figure 4** The expression of glucose transporters (*Glut1* and *Glut3*), amino  
 58 acid transporters (*Slc38a1* and *Slc38a2*) and fatty acid transporters (*Cd36* and *Fabp3*) at the  
 59 mRNA level in the placenta, normalized to *18S*. Data was presented as mean  $\pm$  SEM. One-  
 60 way ANOVA test was conducted followed by Bonferroni test. \* $P < 0.05$ , ns, not significant. n  
 61 = 6 /group.
